# Supplementary material
Source: PubMed Central journal article supplement (PMC3755983)
Supplement: JCI45361sd.pdf [file JCI45361sd.pdf]

## Supplemental Data

# Chronic Epithelial Kidney Injury Molecule-1 Expression Causes Kidney Inflammation and Fibrosis

Benjamin D. Humphreys<sup>\*</sup>, Fengfeng Xu, Venkata Sabbiseti, Ivica Grgic, Said M. Naini, NingNing Wang, Guochun Chen, Sheng Xiao, Dhruvi Patel, Joel M. Henderson, Takaharu Ichimura, Shan Mou, Savuth Soeung, Andrew P. McMahon Vijay K. Kuchroo and Joseph V. Bonventre

\*To whom correspondance should be addressed. E-mail:

[bhumphreys@partners.org](mailto:bhumphreys@partners.org)

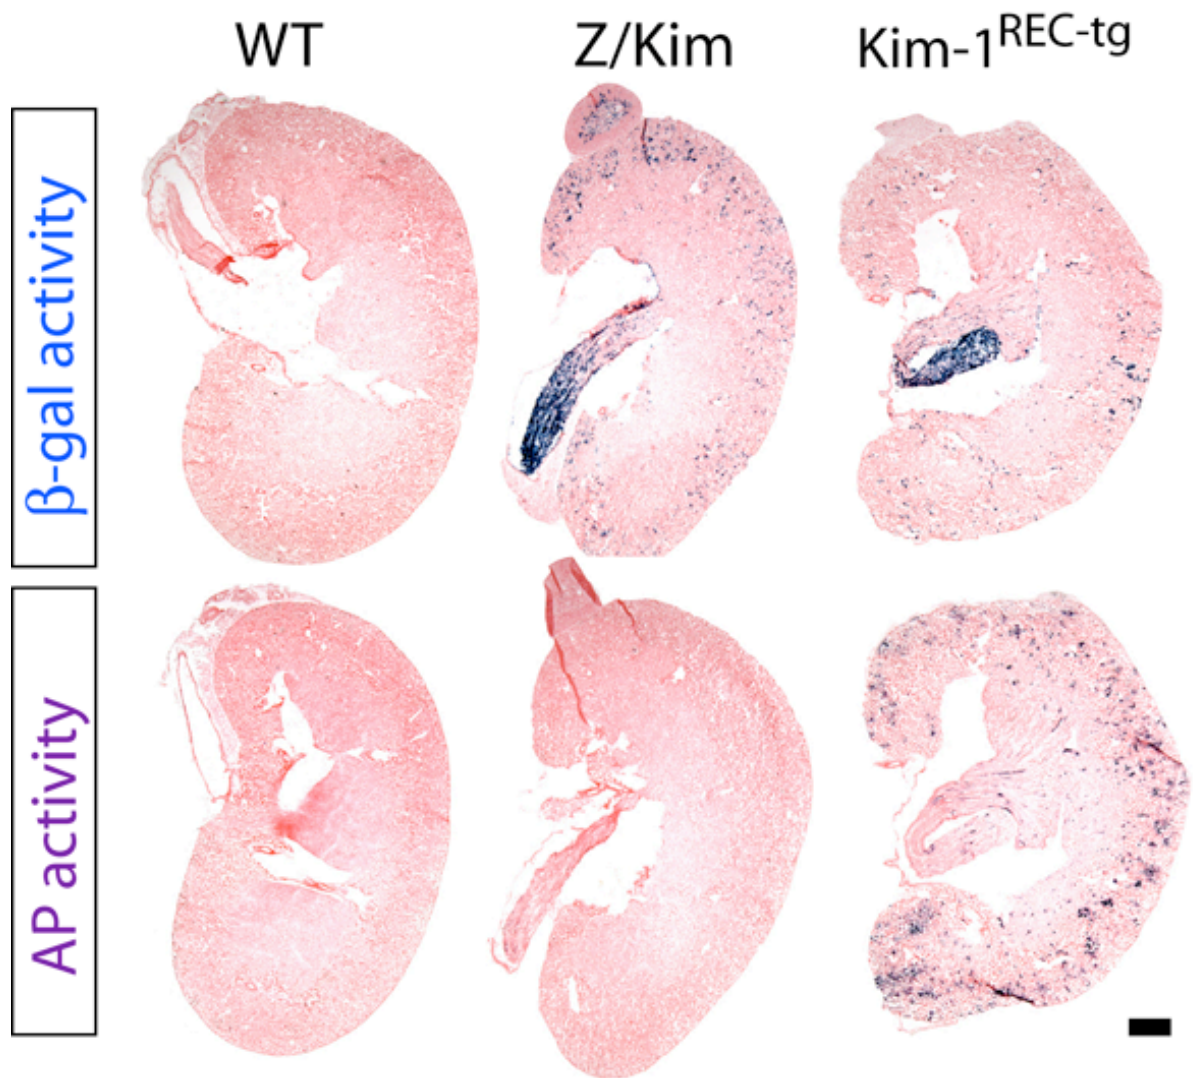

**Supplemental Figure 1.** Bgal and Cre-dependent AP expression in kidneys from transgenic mice. WT mice do not express either Bgal or AP. In kidneys from 4 week unigenic Z/Kim mice, Bgal expression is localized to tubular epithelia primarily in cortex, to glomeruli and to renal papilla. No leaky AP expression was seen. In kidneys from bigenic Kim-1<sup>REC-tg</sup> mice, much less cortical Bgal expression was seen and in its place epithelial AP expression was seen. The renal papilla Bgal expression was unchanged, because Six2-GC does not direct Cre expression in ureteric-bud derived structures. Scale bar, 150  $\mu\text{m}$ .

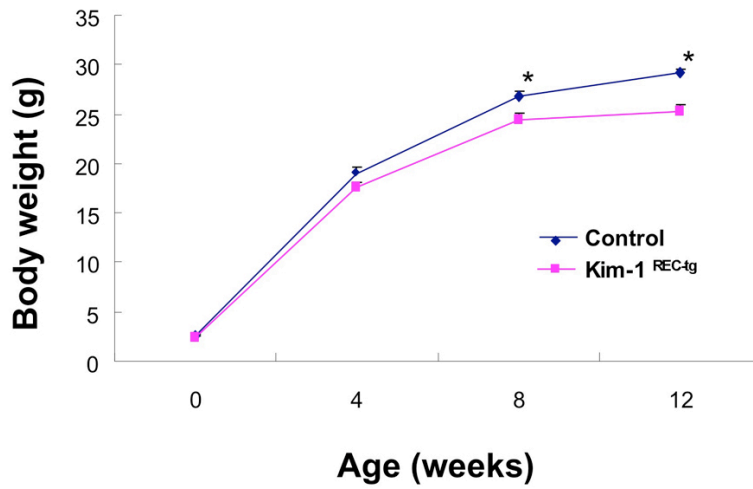

**Supplemental Figure 2. Body weight of Control vs. Kim-1<sup>REC-tg</sup> mice.** Body weight was not different at birth or 4 weeks of age, but Kim-1<sup>REC-tg</sup> gained weight more slowly than littermate controls beginning at 8 weeks. N = 3-7 male mice per timepoint. \*  $P < 0.05$ .

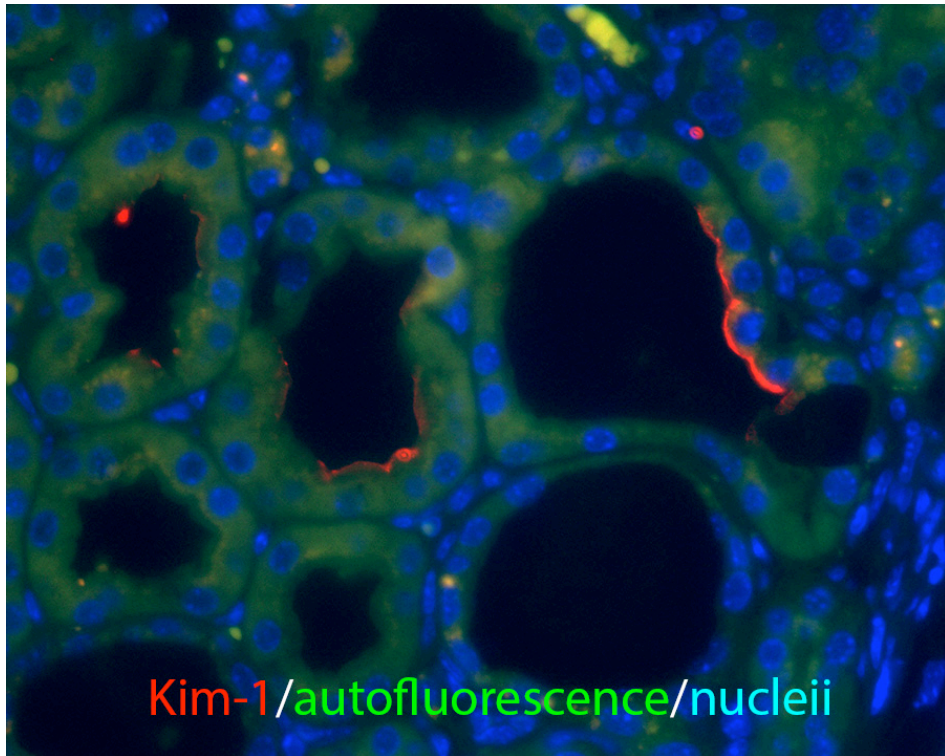

**Supplemental Figure 3.** Kim-1 expression in tubules of 5-week Kim-1<sup>REC-tg</sup> kidneys shows focal expression along the apical membrane of tubular epithelial cells (red).

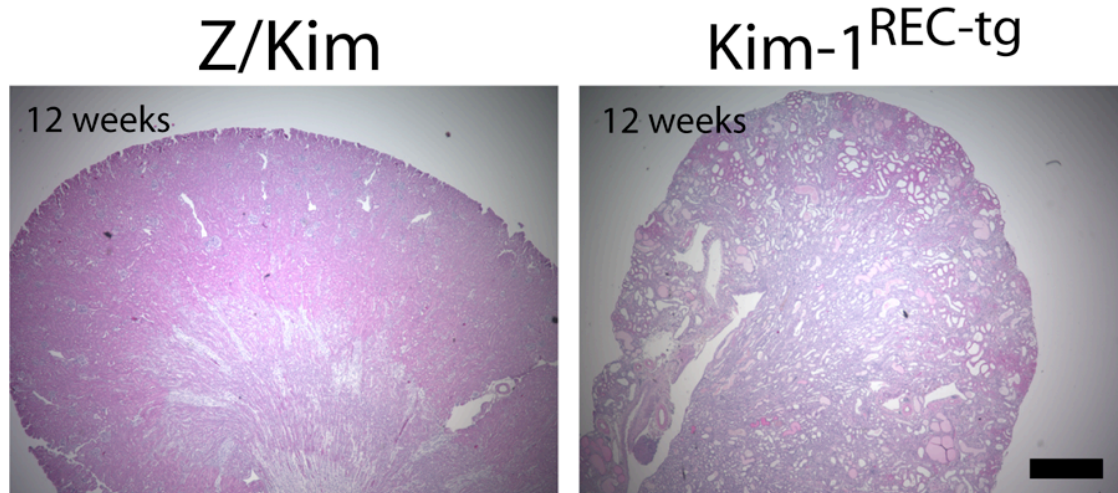

**Supplemental Figure 4.** Low power view of kidney histology in Z/Kim vs. Kim-1<sup>REC-tg</sup> kidneys at 12 weeks. Kim-1<sup>REC-tg</sup> kidneys are characterized by tubular dilation throughout cortex, hyaline casts, interstitial fibrosis and occasional small cysts. Scale bar, 150  $\mu$ m.

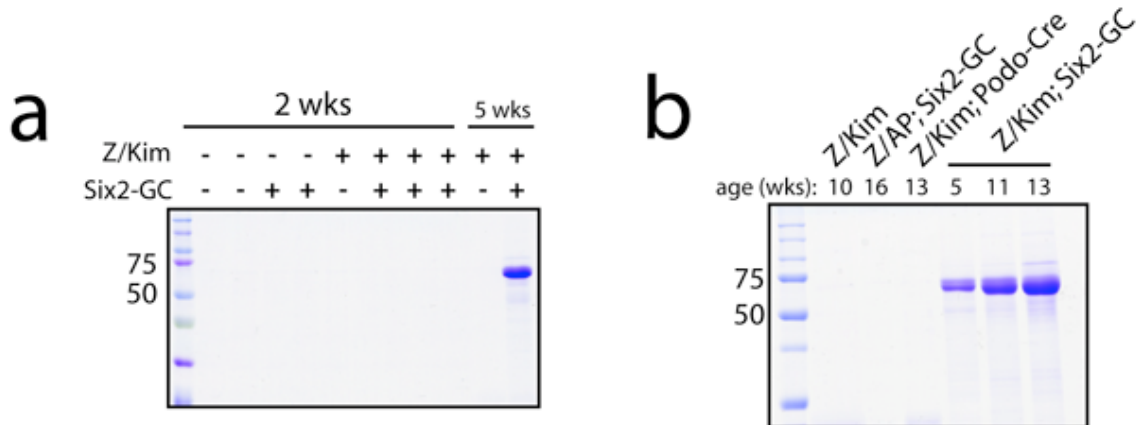

**Supplemental Figure 5.** Proteinuria in Kim-1<sup>REC-tg</sup> but not control mice. (a) Coomassie stain of representative urine samples from control mice or bigenic Z/Kim; Six2-GC (Kim-1<sup>REC-tg</sup>) at 2 weeks show that none have proteinuria. At 5 weeks a band at 70 kDa appears in Kim-1<sup>REC-tg</sup> but not control mice. A total of 5 Kim-1<sup>REC-tg</sup> at 2 weeks of age were analyzed for proteinuria and all had undetectable levels by Coomassie stain (data not shown). (b) Urine from control mice (Z/Kim), or from mice with expression of AP alone in renal epithelia (Z/AP; Six2-GC), or from mice with expression of Kim-1 in podocytes (Z/Kim; Podo-Cre) or from Kim-1<sup>REC-tg</sup> was separated and coomassie stained. The only genotype that demonstrated proteinuria was the Kim-1<sup>REC-tg</sup> (Z/Kim; Six2-GC). This is a representative gel. Urine from a minimum of 5 animals of each genotype showed similar results.

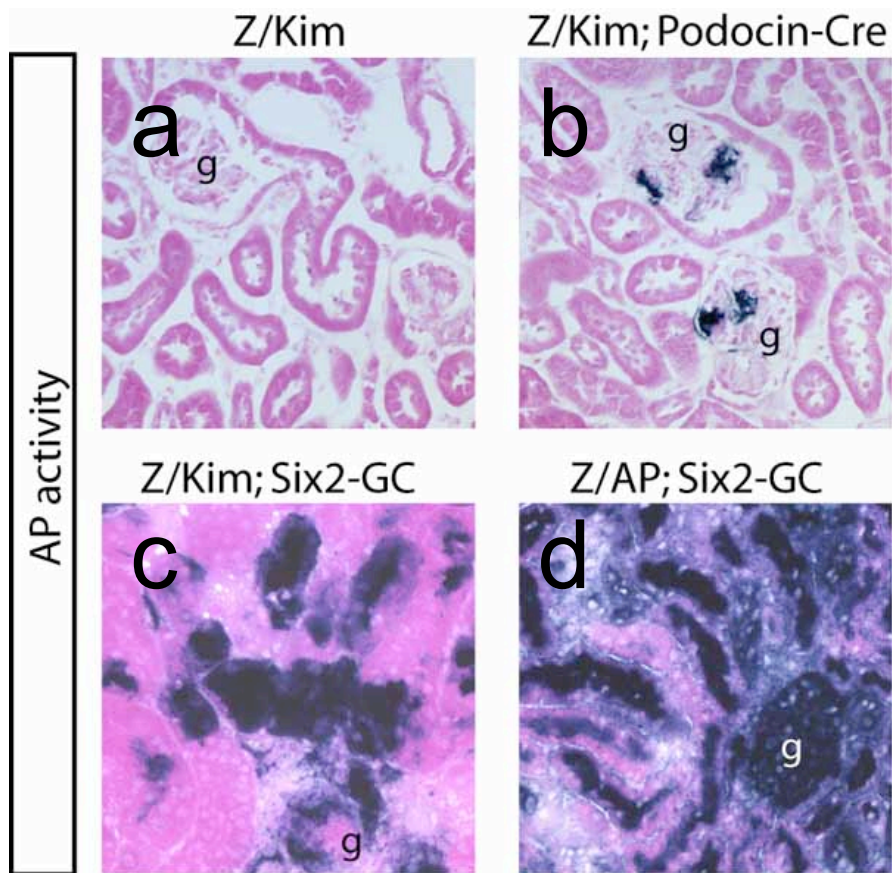

**Supplemental Figure 6.** Alkaline Phosphatase (AP) expression in various lines used in the present study. (a) Z/Kim transgenic mice do not express AP in kidney. (b) Z/Kim; Podocin-Cre bigenic mice express AP in 55% of glomeruli (g) in a focal pattern. (c) Z/Kim; Six2-GC (Kim-1<sup>REC-tg</sup>) express AP in a focal pattern in glomeruli and in 10 – 20% of cortical tubules. (d) Z/AP; Six2-GC bigenic mice express AP throughout glomeruli and nearly 100% of cortical tubules.
